# Supplementary material
Source: PubMed Central journal article supplement (PMC3685183)

Figure S1

Guo et al

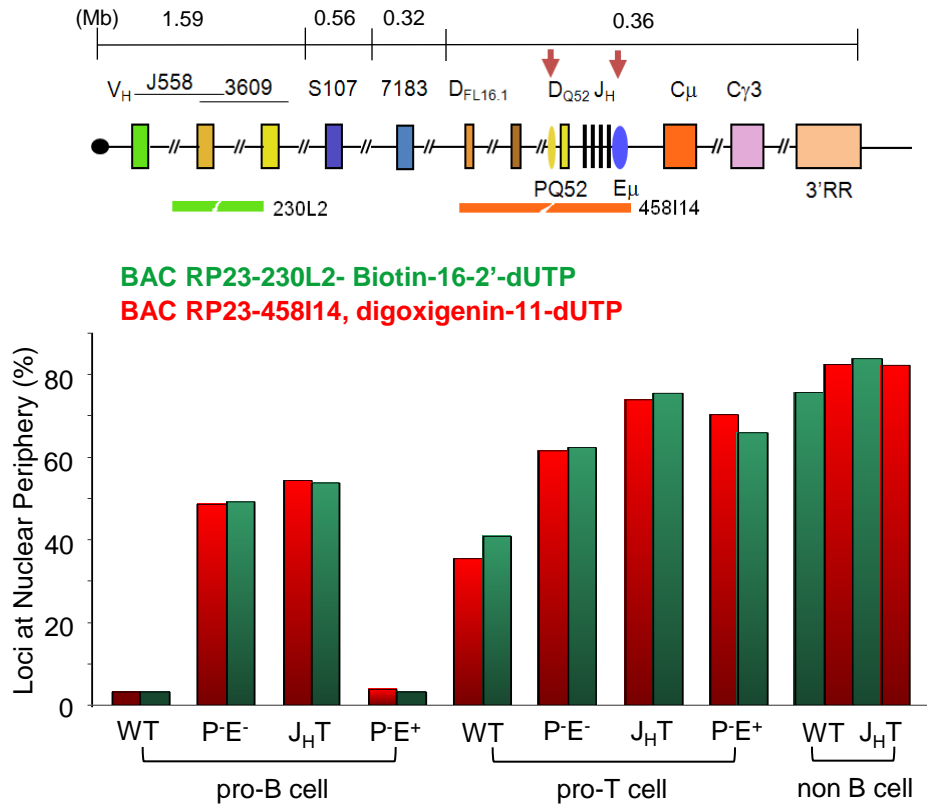

**A**

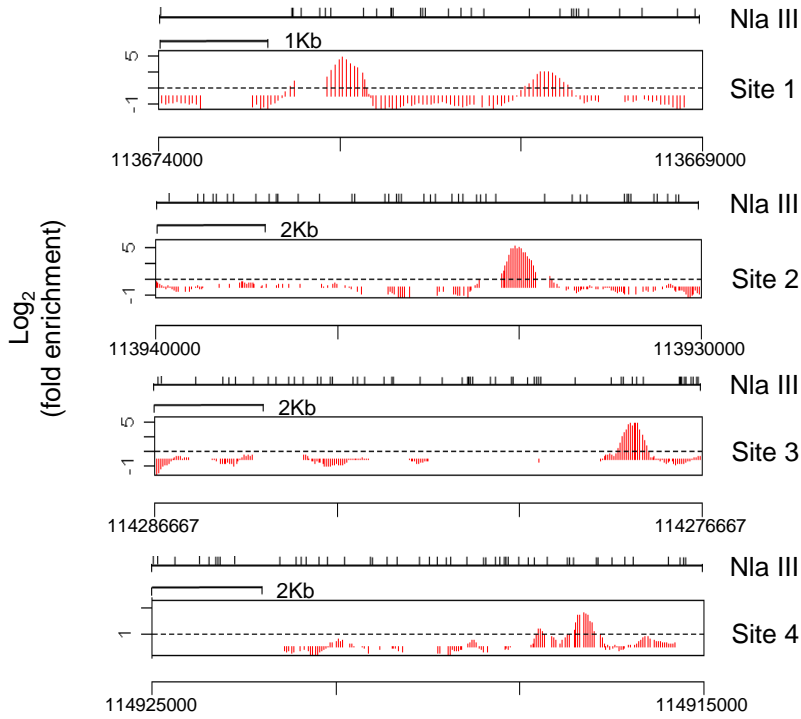

**B**

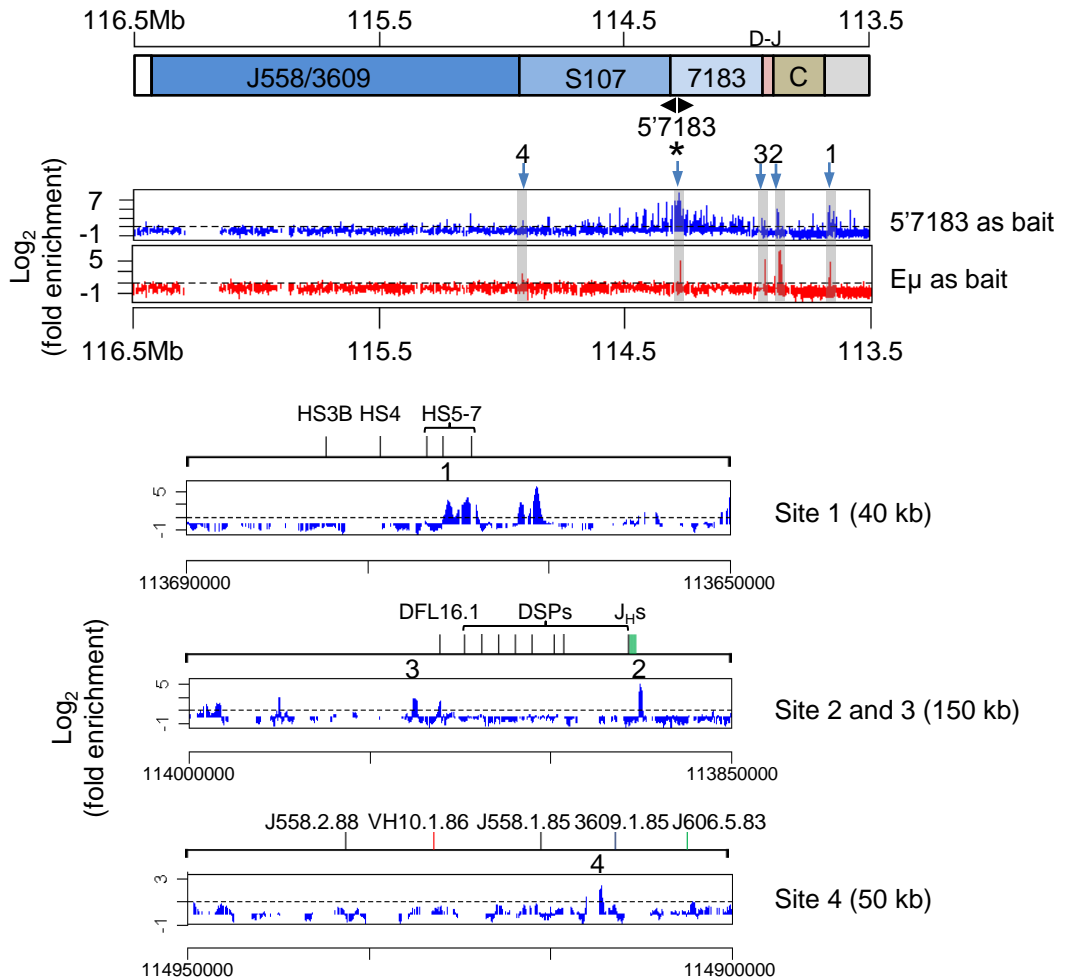

Figure S3

Guo et al

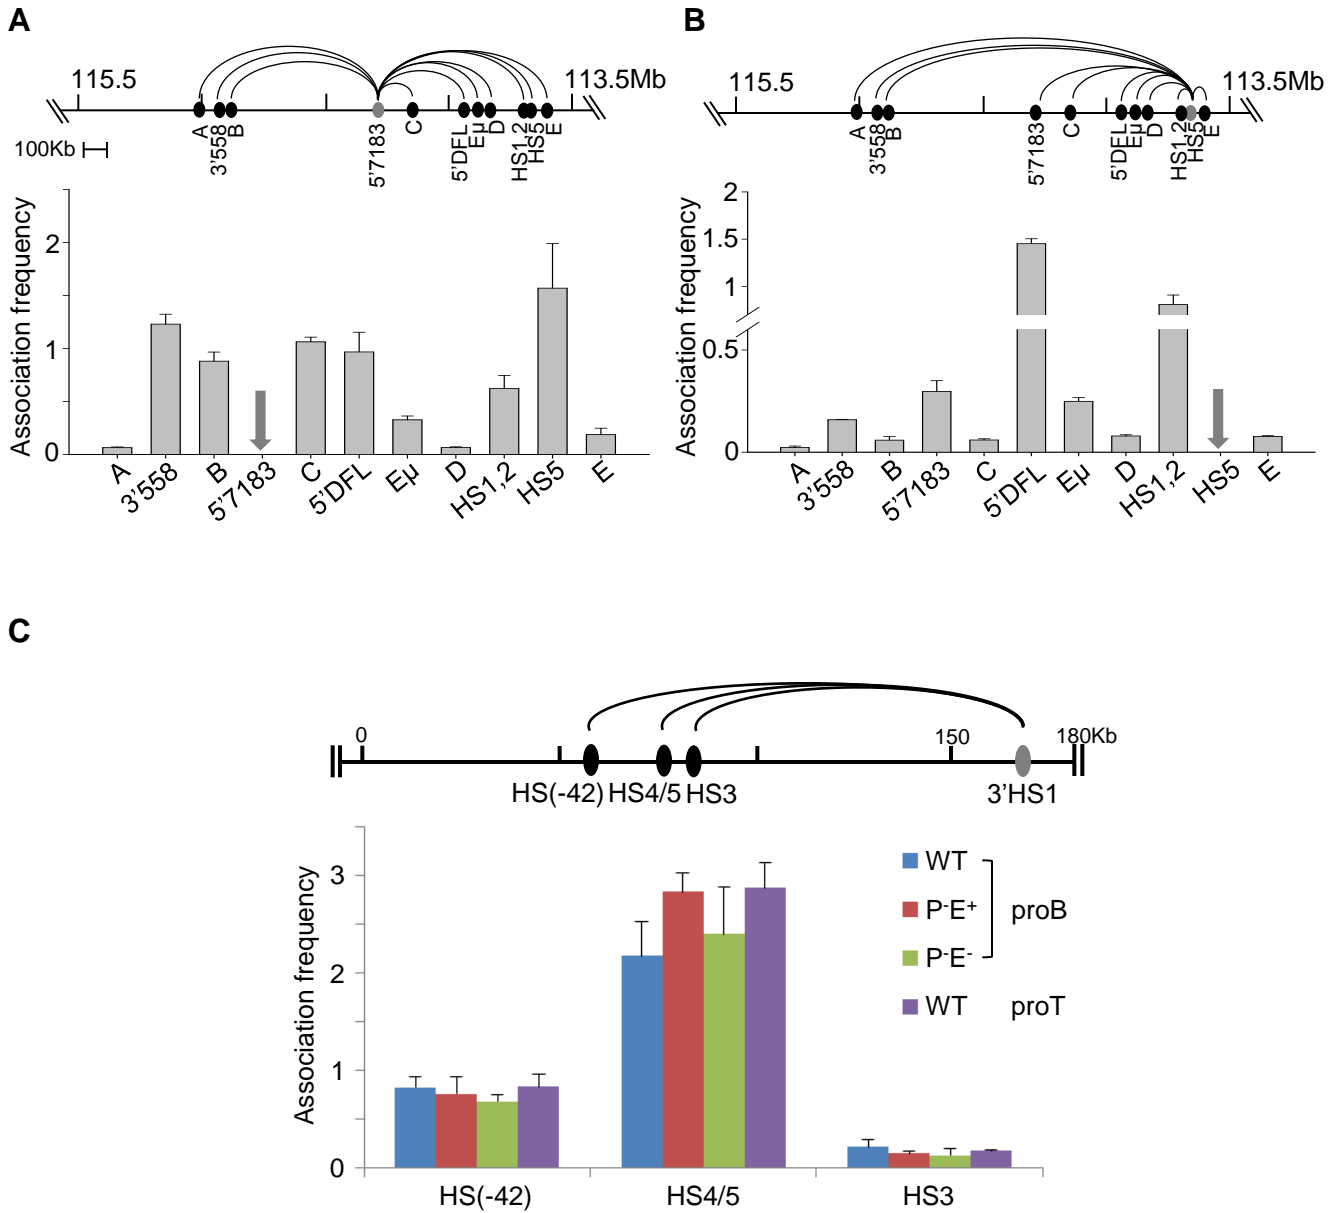

**A**

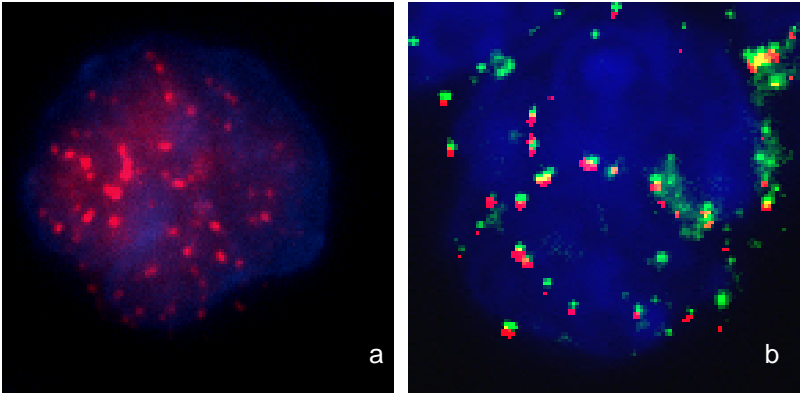

**B**

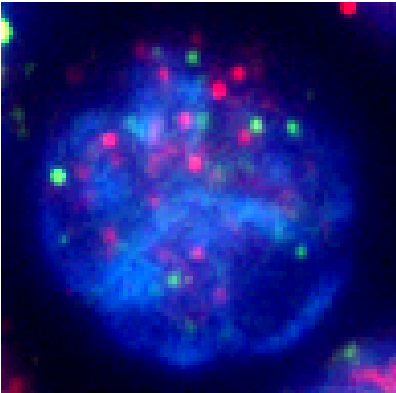

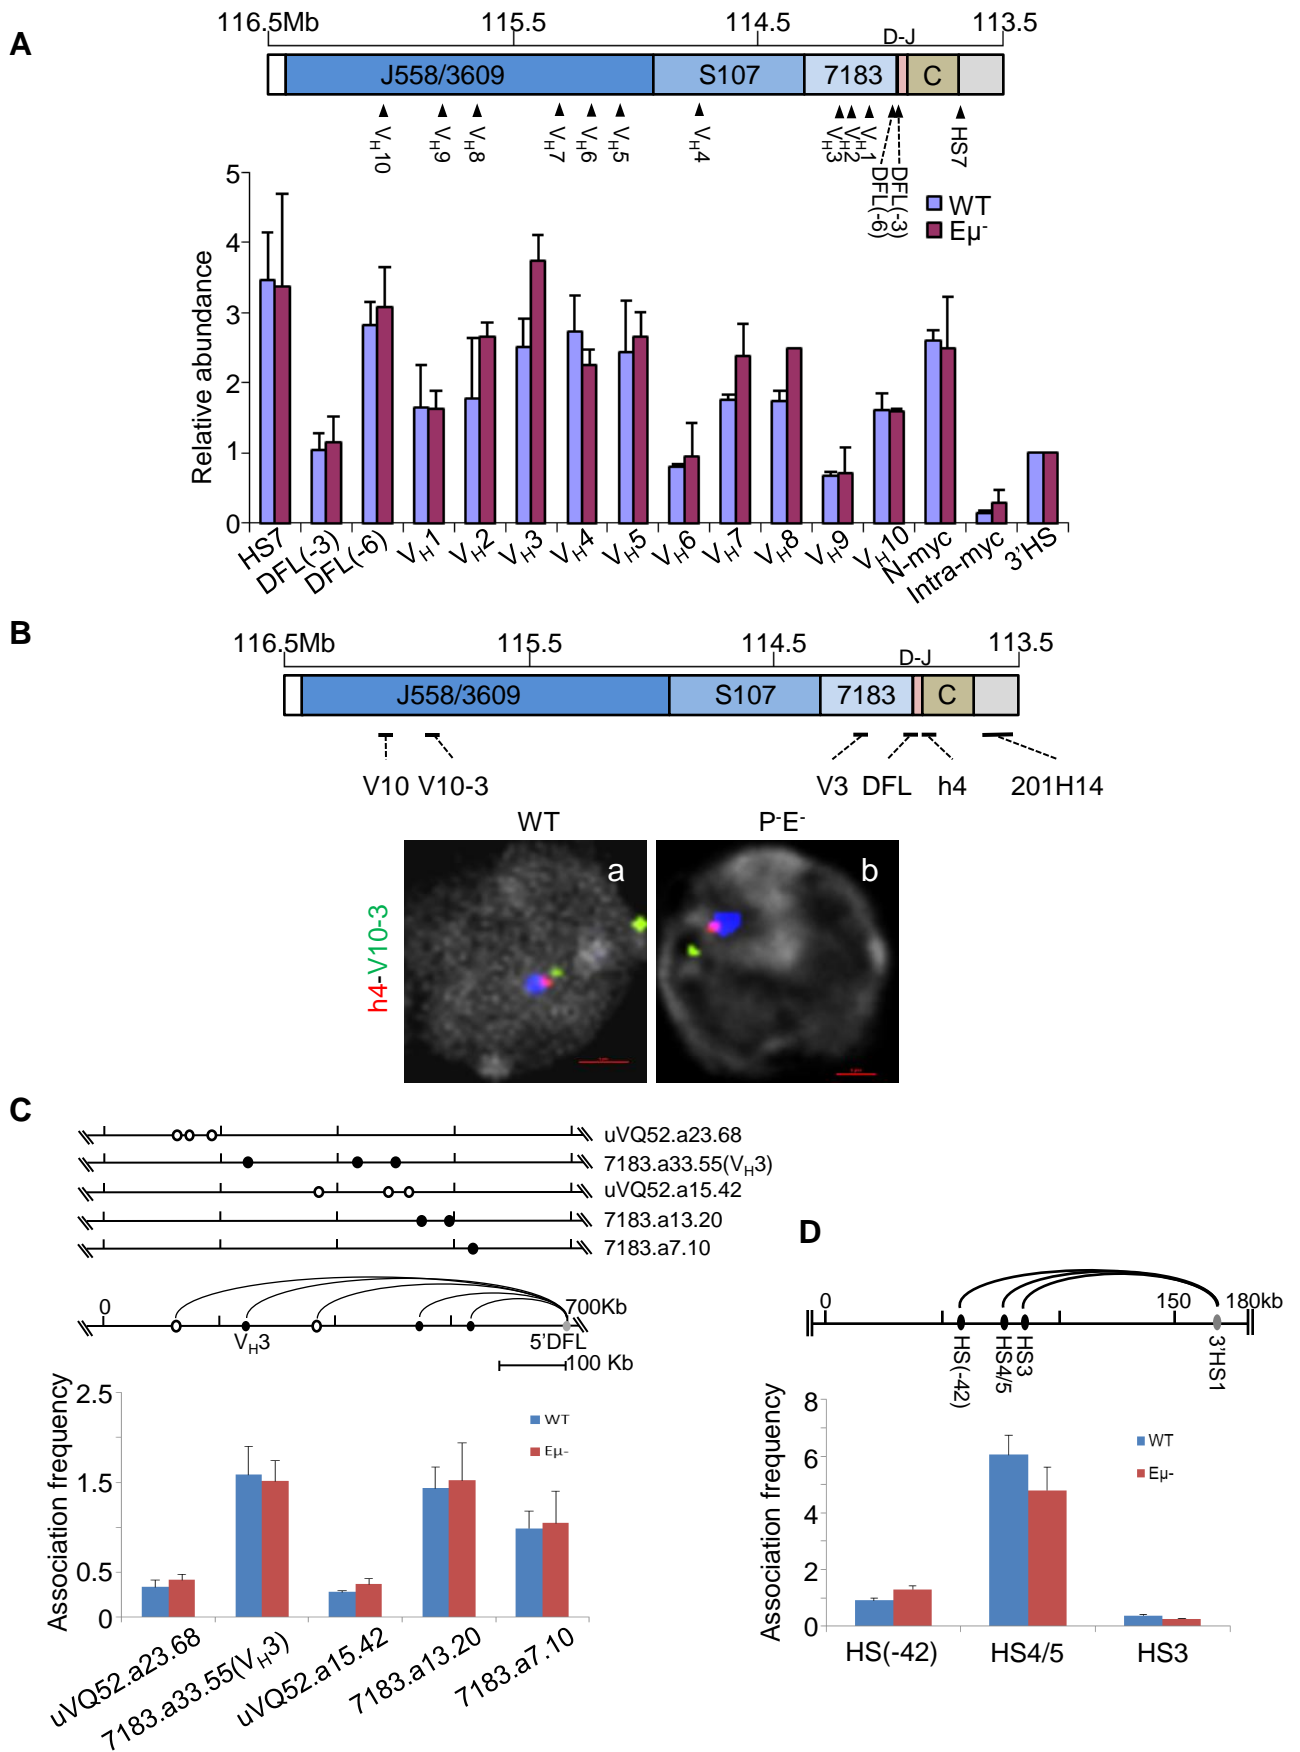

Supplement: NIHMS330380-supplement-02.pdf [file NIHMS330380-supplement-02.pdf]
